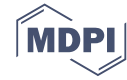

Article

# TERribly Difficult: Searching for Telomerase RNAs in Saccharomycetes

Maria Waldl <sup>1,†</sup>, Bernhard C. Thiel <sup>1,†</sup>, Roman Ochsenreiter <sup>1</sup>, Alexander Holzenleiter <sup>2,3</sup>, João Victor de Araujo Oliveira <sup>4</sup>, Maria Emília M. T. Walter <sup>4</sup>, Michael T. Wolfinger <sup>1,5\*</sup> , Peter F. Stadler <sup>6,7,1,8\*</sup> 

<sup>1</sup> Institute for Theoretical Chemistry, University of Vienna, Währingerstraße 17, A-1090 Wien, Austria; {maria,thiel,romanoch}@tbi.univie.ac.at, michael.wolfinger@univie.ac.at

<sup>2</sup> BioInformatics Group, Fakultät CB Hochschule Mittweida, Technikumplatz 17, D-09648 Mittweida, Germany; alexander.holzenleiter@web.de

<sup>3</sup> Bioinformatics Group, Department of Computer Science, and Interdisciplinary Center for Bioinformatics, University of Leipzig, Härtelstraße 16-18, D-04107 Leipzig, Germany

<sup>4</sup> Departamento de Ciência da Computação, Instituto de Ciências Exatas, Universidade de Brasília; joaovicers@gmail.com, mariaemilia@unb.br

<sup>5</sup> Center for Anatomy and Cell Biology, Medical University of Vienna, Währingerstraße 13, 1090 Vienna, Austria

<sup>6</sup> German Centre for Integrative Biodiversity Research (iDiv) Halle-Jena-Leipzig, Competence Center for Scalable Data Services and Solutions, and Leipzig Research Center for Civilization Diseases, University Leipzig, Germany

<sup>7</sup> Max Planck Institute for Mathematics in the Sciences, Inselstraße 22, D-04103 Leipzig, Germany

<sup>8</sup> Santa Fe Institute, 1399 Hyde Park Rd., Santa Fe, NM 87501

\* Correspondence: MTW michael.wolfinger@univie.ac.at; PFS studla@bioinf.uni-leipzig.de

† These authors contributed equally to this work.

Version May 15, 2018 submitted to Genes

**Abstract:** The telomerase RNA in yeasts is large, usually > 1,000 nt, and contains functional elements that have been extensively studied experimentally in several disparate species. Nevertheless, they are very difficult to detect by homology-based methods and so far have escaped annotation in the majority of the genomes of Saccharomycotina. This is a consequence of sequences that evolve rapidly at nucleotide level, are subject to large variations in size, and are highly plastic with respect to their secondary structures. Here we report on a survey that was aimed at closing this gap in RNA annotation. Despite considerable efforts and the combination of a variety of different methods, it was only partially successful. While 27 new telomerase RNAs were identified, we had to restrict our efforts to the subgroup *Saccharomycetacea* because even this narrow subgroup was diverse enough to require different search models for different phylogenetic subgroups. More distant branches of the Saccharomycotina still remain without annotated telomerase RNA.

**Keywords:** non-coding RNA; telomerase RNA; secondary structure; synteny; homology search; yeast

## 1. Introduction

The linear chromosomes of eukaryotes require a specialized mechanism for completing duplication. Most commonly this is achieved by a special reverse transcriptase, telomerase, that carries a specific RNA the template with telomeric sequence [1]. Most likely, this constitutes the ancestral state in eukaryotes. Despite its crucial function, telomerase has been lost several times in both animals (in particular insects) and possibly also in some plants [2]. In some cases, the ancestral telomere structure has been replaced by tandem arrays of DNA sequences that look much like heterochromatin

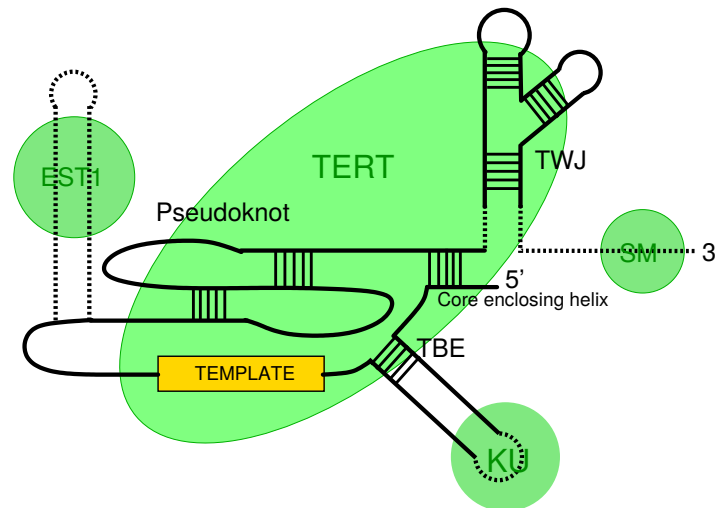

**Figure 1.** Schematic organization of TER. Contact regions for important binding sites are indicated by green circles (EST1, SM, KU). The green ellipse denotes the contact region with the reverse transcriptase (TERT). Other major features are the template, the pseudoknot region, the template boundary element (TBE) and the three-way junction (TWJ). Adapted from [8].

20 and can be elongated by gene conversion. Specialized telomere-specific retrotransposons are at work  
21 in *Drosophila* [3].

22 The telomerase (holo)enzyme consists of two main components, a specialized reverse transcriptase  
23 (TERT) and a RNA component (TER) that provides the template sequence. In addition, there are  
24 usually multiple clade-specific accessory protein components [4]. Four conserved regions in TER,  
25 Fig. 1, are essential for telomerase activity: the template boundary element (TBE), the pseudoknot, and  
26 the template sequence itself are part of the catalytic core. The fourth region, the trans activating  
27 domain, is involved in binding of TERT [5]. The three-way junction (TWJ) structure of this region  
28 is widely conserved at least between animal and fungal telomerase RNAs, where it is crucial for  
29 proper functioning [6]. The precisely defined template within TER is processively copied by TERT and  
30 regenerated, releasing a single-stranded DNA product [7].

31 Telomerase RNA is highly divergent. The TER in ciliates [9], human [10], and budding yeast  
32 [11] have a length of about 150 nt, 438 nt, and ~1.3 kb, respectively. A TER more than 2kb in length  
33 has been reported for *Candida glabrata* [12], which, interestingly, seems to lack a TWJ. TERs in other  
34 kingdoms of eukaryotes have been discovered only quite recently in plants [13,14], excavates [15,16]  
35 and alveolates [17,18].

36 Despite their deeply conserved primary function and architectural similarities that seem to extend  
37 across eukaryotic kingdoms, TERs have turned out to be very difficult to find by homology search  
38 even within phylogenetically relatively narrow groups. Within the animal kingdom, even surveys  
39 of vertebrates turned out to be non-trivial [19]. Echinoderm TERs were found by deep sequencing  
40 of *Strongylocentrotus purpuratus* RNA pulled down with the TERT protein [20] after homology based  
41 searches remained unsuccessful. This opened the door to identifying TERs from other sea urchins,  
42 brittle stars, and a crinoid [21]. Still, no TER from a protostome is known.

43 Within Fungi, the situation is similar: So far, TERs have been reported only for Ascomycota, while  
44 no candidates are known in Basidiomycota and any of the basal divisions. The TERs of Pezizomycotina  
45 and Taphrinomycotina share core features of vertebrate TERs. In particular, they have a fairly  
46 well-conserved secondary structure of the pseudoknot and the TWJ, and at least in these regions  
47 the sequence is sufficiently conserved for successful homology-based identification of TERs within  
48 these clades [22–24]. The TERs known for Saccharomycetes, the relatives of budding yeast, on the

49 other hand, are sometimes remarkably large and present little similarity in sequence and secondary  
50 structure to vertebrate or ciliate TERs.

51 To-date, yeast TERs have been reported for three phylogenetically narrow subgroups  
52 (*Saccharomyces spp.* [11,25], *Kluyveromyces spp.* [6,26,27], and *Candida spp.* [28,29]), as well as some  
53 individual species such as *Candida glabrata* [12] and *Hansenula polymorpha* [30]. These sequences  
54 are already too diverse for reliable sequence alignments. It is not surprising, therefore, that simple  
55 sequence-based homology searches have not been successful in identifying TER in the majority of the  
56 saccharomycete genome sequences to-date. Even protein binding sites that are functionally important  
57 in budding yeast [31] are not widely conserved. For instance, Ku or Sm binding sites seem to be absent  
58 in the TERs of filamentous fungi [4,22].

59 The obvious alternative is to increase the set of known TERs by finding homologs that are  
60 sufficiently similar to one of known yeast TERs, to allow the construction of multiple alignments of  
61 phylogenetically narrow subgroup. From these alignments, conserved elements can be extracted,  
62 which in turn form the basis for searches with tools such as *fragrep* [32] or *infern1* [33]. This  
63 strategy has been successful in previous searches for TER genes in both animals [19] and fungi [22],  
64 but so-far has not been successfully applied to Saccharomycetes.

65 Until very recently, a phylogenetically local approach to homology search was also hampered by  
66 the lack of a trustworthy phylogeny of the Saccharomycotina. Recent updates in the International Code  
67 of Nomenclature for algae, fungi and plants [34,35] have substantially restructured the classification of  
68 fungi in general and of Saccharomycotina in particular. With large-scale efforts to sequence fungal  
69 genomes underway, first phylogenomic studies provide a trustworthy backbone of Saccharomycotina  
70 phylogeny [36], which we largely confirmed with an independent analysis.

## 71 2. Materials and Methods

### 72 2.1. Phylogenomics of Ascomycotes

73 Annotated protein sequences for 72 yeast species were downloaded from RefSeq. Initially,  
74 ProteinOrtho [37,38] was used to identify an initial set of 21,289 ortholog groups. Only 193 of these  
75 contained representatives of all 72 species. We therefore included all 1666 ortholog groups that covered  
76 at least 67 species. We used OMA (2.2.1) [39,40] to decompose the ProteinOrtho groups further into  
77 clusters of 1-1 orthologs. This resulted in 6,295 groups of which 841 contained at least 67 species. This  
78 conservatively filtered data set was then processed with Gblocks [41] to remove uninformative and  
79 potentially error-prone parts of the alignment, resulting in a data set comprising 72 species and 248,581  
80 characters. Phylogenetic trees were estimated with RAxML [42].

### 81 2.2. Ascomycote Telomerase RNAs

82 Telomerase RNA regions have been published for several *Saccharomyces* [11,25], *Kluyveromyces*  
83 [6,26,27], and *Candida* [12,28,29] species. Most of these published TER regions are collected in the  
84 telomerase database [43], which therefore provided a good starting point for our research. These  
85 sequences, however, are too diverse to construct multiple sequence alignments beyond the three  
86 genera individually. This effectively prohibits the automated discovery of novel TERs beyond close  
87 relatives with the help of either *blast* [44] (using sequence information alone) or *infern1* (relying on  
88 a combination of sequence and secondary structure information).

89 Therefore, we explored different strategies to overcome the limitations imposed by the extremely  
90 poor sequence conservation of saccaromycete telomerase RNAs. The basic idea is to use common  
91 features of the TERs to extract candidates from the genomes that can be analyzed and then inspected  
92 further using different techniques.

93 First, we attempted to learn TER-specific sequence patterns using MEME/GLAM2 [45], and also  
94 several machine learning techniques using *k*-mer distributions within sequence windows of the size

95 of the known TERs. All attempts to learn from a training set covering the *Saccharomycetaceae* or all  
96 *Saccharomycotina* species failed.

97 There are several possible reasons. Machine learning methods crucially depend on a training and  
98 test sets, both positive and negative. In our case we have few positive samples, these have poorly  
99 defined features, and are very diverse as far as their sequences are concerned. It is unclear in this setting  
100 how a negative training set should be properly designed. The obvious choice of picking genomic  
101 sequence at random may be confounded by unintended strong signals, such as coding potential or  
102 repetitive sequence elements. It would appear that at the very least a more a careful construction  
103 of the positive and negative sets, and an appropriate normalization or scaling of the feature data  
104 will be required to make progress in this direction. Restricting the training phase to a more narrow  
105 phylogenetic range to reduce the inherent diversity of the training data, on the other hand, is infeasible  
106 due to the small number of known TER sequences.

107 The EDeN motif finder [46] was applied to 24 known TERs as positive set and 48 shuffled sequences  
108 as negative data. Only trivial sequence motifs such as a poly-U stretch, presumably corresponding to part  
109 of the U-rich pseudoknot region, were found. Unsupervised clustering also remained unsuccessful.

### 110 2.3. Synteny-Based Homology Search

111 As an alternative strategy, we established a semi-automated workflow that aims at first extracting  
112 partially conserved RNA sequence-structure elements, which are then used to identify candidate loci.  
113 In response to the negative results of a direct pattern-based approach, we systematically used synteny  
114 to narrow down the search space in the initial phase. Starting from a whole genome alignment of  
115 phylogenetically related species, we used the positions of protein coding genes whose homologs are  
116 known to be adjacent in a closely related species to delimit the syntenic regions that are likely to contain  
117 a TER gene. These candidate regions were then analyzed in detail by means of pairwise or multiple  
118 sequence alignments. Whenever a global alignment of the entire candidate syntenic region did not  
119 yield a plausible alignment, we attempted to identify conserved motifs inside the syntenic region  
120 (usually the SM binding site and/or the template region, which is sometimes conserved between close  
121 relatives). Typically, these motifs were also sufficient to determine the correct reading direction of the  
122 TER candidate.

123 To identify known features in the candidate TER regions, we first constructed *infernal* [33]  
124 covariance models restricted to subgroups of *Saccharomycetaceae* covering only substructures, such  
125 as the Ku hairpin, Est1 binding site, and TWJ in the *Saccharomyces* and *Kluyveromyces* species. The  
126 alignments underlying the *infernal* models were constructed with the help of many software tools,  
127 including *locarna* [47], *mafft* [48], *mauve* [49], *MEME* [45] and *fragrep* [32], as well as manual curation.  
128 These models were then used for precise localization of conserved TER elements in species that were  
129 (a) taxonomically closely related, but not/only partially annotated in literature (*Saccharomyces woarum*,  
130 *Saccharomyces sp. 'boulardii'*, *Saccharomyces sp. M14*, *Saccharomyces eubayanus* or (b) phylogenetically  
131 located in the subtree spanned by the *Saccharomyces* and *Kluyveromyces* species (see Fig. 2). Both  
132 the *ViennaNGS* [50] suite and custom Perl/Python scripts were used for handling and conversion of  
133 genomic annotation data.

134 We then extracted a sequence corresponding to the most closely related TER sequence as initial  
135 estimate of the full-length TER gene. We used *mafft* [48] to produce initial sequence-based alignments  
136 of candidate regions, which were then realigned with *locarna* [47] to obtain RNA structural alignments.  
137 The latter was used with its free-end-gaps option, in particular in those cases where *mafft* was not  
138 sensitive enough to reliably estimate the TER boundaries. Conversely, *mafft* was able to identify and  
139 correctly align highly conserved subsequences, providing reliable anchors for the more divergent  
140 sequence regions. While *locarna* is good at finding locally conserved structures in the whole alignment,  
141 we expected only parts of the TER sequences to be structurally conserved. Typically multiple iterations  
142 of refinement of the TER boundaries were required to obtain the final TER candidate sequence.

143 Following this approach, we could localize TER regions for several members of the  
144 *Saccharomycetacea* clade. Subsequent alignment of candidate regions with known TERs allowed  
145 for exact localization of TERs.

#### 146 2.4. Search for Candidates Using Telomere Template Sequences

147 The scope of the synteny-based approach is limited because fungal genomes are subject to frequent  
148 genome rearrangements at the time-scales of interest. We therefore attempted to identify candidate  
149 regions containing the template sequence for the telomere repeats. (See [51] for a comprehensive  
150 review of the characteristics of different telomeric repeats.) In genomes for which these sequences  
151 have not been reported, we searched chromosome ends for telomeric repeats. Unfortunately, most  
152 genome assemblies are not on chromosome level or do not include the telomere regions, hence we  
153 only succeeded to newly identify the template region of *Ashbya aceri* and *Eremothecium cymbalariae* this  
154 way. For the latter species, the pertinent information is available in [52], although the telomeric repeat  
155 is not explicitly reported. In addition, we used the published telomere sequences from the telomerase  
156 database [43].

157 We used the concatenation of two copies of telomeric repeat sequence as query for a blast [44]  
158 search against the whole genome (in case of longer, complex repeats) or against the syntenic region for  
159 shorter repeats. Other template regions were identified with by aligning them to known sequences  
160 and/or blast searches of known template regions in closely related species. A typical feature of the  
161 template region, which helped us to verify our hits, is the fact that it usually contains a few nucleotides  
162 repeated at both the beginning and the end of the template region [12].

#### 163 2.5. Blast Pipeline

164 blast [44] is by far the most commonly used tool for homology search. While it has been reported  
165 to have limited sensitivity for telomerase RNAs in previous studies [19,20,32], it has contributed  
166 significantly to the identification of the TER sequences in other ascomycete clades [22,24]. Here we  
167 used a set of known TER regions as blast queries that comprises all Saccharomycetales TER regions  
168 that we found in literature, as well as all TERs newly identified in the contribution. As targets for  
169 blastn (with default parameters) we used the full genomes of species that are featured at the NCBI  
170 refseq database within the Saccharomycetales group (Taxonomy ID: 4892). The resulting blast hits  
171 were then filtered for E-values ( $E < 0.1$ ), a minimum alignment length of 25nt and a minimum identity  
172 of 60%. In addition, all hits on known telomeric regions were excluded. From the hits in genomes  
173 with known TERs we computed the empirical false positive rate and found that the alignment length  
174 proved to be the most informative parameter. It has therefore been used to evaluate the reliability of  
175 hits, given their score.

176 The blast pipeline also contributed to the identification of the TER boundaries in some of the  
177 unannotated genomes. In cases where we initially chose the boundaries of our queries too generously  
178 and included neighboring coding regions or regulatory elements, the blast pipeline returned “false  
179 positive” hits. Thus, whenever multiple false positive hits in the beginning or the end of the query  
180 sequence occurred, we rechecked and, if necessary, improved the boundaries of the TER region.

### 181 3. Results

#### 182 3.1. Phylogenomics of *Saccharomycotina*

183 The phylogenetic trees obtained of our phylogenomic analysis of the Saccharomycetales is  
184 essentially congruent with the one reported by Shen *et al.*[36], see the Appendix for more details. For  
185 consistency, we adopted the phylogenetic tree published by Shen *et al.*[36] as the basis for presenting  
186 our results.

### 187 3.2. Survey of TER Genes in *Saccharomycotina*

188 We initially screened 52 ascomycote genomes. Predominantly sequence-based methods (blast,  
189 but also meme, glam2, and infernal) only contributed TERs from close relatives of baker's yeast. The  
190 blast pipeline was applied to all 185 NCBI genomes *Saccharomycetales*, the subclade containing  
191 all known *Saccharomycotina* genomes. With the exception of the TER in *Ogataea parapolymorpha*, a  
192 very close relative of the known *Ogataea polymorpha* TER [30] all new sequences we found within the  
193 *Saccharomycetaceae*. We therefore restricted a more detailed analysis to this clade.

194 We found credible TER sequences in 46 of the 53 *Saccharomycetaceae*. Most of these TER  
195 sequences could be detected only after a short candidate region had been identified based on synteny.  
196 To our knowledge, at least 27 of these have not been reported previously.

### 197 3.3. Features of TER in *Saccharomycetacea*

198 In order to better understand the TER and its evolutionary constraints at least within the  
199 *Saccharomycetacea* we performed a detailed analysis of their structural features. Table 1 summarizes  
200 the results of the homology search and the functional features of the candidate TER genes. A graphical  
201 overview is given in Fig. 2.

202 The exact genomic positions marking the 3' and 5' ends of the TER RNA are difficult to determine  
203 without additional experimental evidence. The 5' ends are therefore approximate. The 3' end of the  
204 mature TER is produced by splicing in most Ascomycota [24,59,60]. This mechanism, however, was  
205 lost at some point during the evolution of the *Saccharomycotina*. It has been reported in the *Candida*  
206 group and for *Ogataea angusta* (previously *Hansenula polymorpha*), but it is missing in *Saccharomyces*  
207 and *Kluyveromyces* [24]; hence we expect that the splicing-based 3'-end processing was lost prior to  
208 the divergence of *Saccharomycetacea*. Indeed, no indication of a splice site was found for any of the  
209 TER sequences included in Table 1. We therefore used a position 10 nt downstream of the SM binding  
210 motif as approximation of the 3' end in Table 1.

211 Several of the features listed in Table 1 have been discussed in some detail in the literature. Not  
212 all of them were found in all the candidates reported here. This may, in some cases, be explained  
213 by sequences that are too divergent to be detected. In other cases, most likely the function is not  
214 preserved. Unfortunately, many studies report neither complete sequences nor coordinates, making it  
215 effectively impossible to accurately compare their results with the annotation reported here. References  
216 are included in Table 1 if sufficient information was included to locate the features unambiguously.

217 No Ku binding hairpin was recovered in *Kluyveromyces* or the *Eremothecium* species. This is not  
218 unexpected since there is experimental evidence that neither the Ku binding hairpin nor its function  
219 is present in *K. lactis* [53]. The putative Ku binding hairpin reported for *Candida glabrata* in [12]  
220 lacks experimental support and contains long insertions that made it impossible to include it in our  
221 covariance model. Furthermore, this region of the TER sequence is very poorly conserved in the closest  
222 relatives of *C. glabrata*. While the TER of *C. glabrata* is among the longest known members of this gene  
223 family [12], its close relative *C. castellii* features a TER that has been shortened drastically in its 3' half,  
224 with only ~ 200 nt separating the EST1 and SM1 binding sites. Furthermore, the sequence GCUA, which  
225 is conserved in most known Ku binding sites, is not present within 600nts upstream of the template  
226 region. The most likely explanation is that the TER of *Candida castellii* (which like *Candida glabrata* does  
227 not belong to the monophylogenetic genus *Candida*, see Appendix) does not bind Ku. Of course, we  
228 cannot rule out without further experimental data that the motif has diverged beyond our ability to  
229 recognize it.

230 In a few species we failed to identify the template region. In these cases (*Lachancea*,  
231 *Zygosaccharomyces* and *Torulaspora* species and *Nakaseomyces bacillisporus*) the telomeric repeat sequence  
232 is not known and seems to be very different from both the fungal consensus sequence TTAGGG [22] and  
233 the telomeric sequences found in closely related species.

234 The EST1 binding site could not be identified in *Eremothecium* species, *Lachancea dasiensis* and in  
235 the *Candida glabrata* group, even though it has been published for *Candida glabrata*. While an EST1

| Species                    | Accession      | Strand | TER coordinates      | Ku binding site    | Template region    | Est1 binding site  | TWJ               | SM1                |
|----------------------------|----------------|--------|----------------------|--------------------|--------------------|--------------------|-------------------|--------------------|
| <i>K. aestuarii</i>        | AEAS01000245.1 | neg    | 16338-17322 [26]     |                    | 16940-16966        | 16794-16862 [26]   | 16378-16485 [6]   | 16350-16359        |
| <i>K. wickerhamii</i>      | AEAV01000432.1 | pos    | 250-1327 [26]        |                    | 662-693            | 765-858 [26]       | 1183-1290 [6]     | 1307-1316          |
| <i>K. marxianus</i>        | NC_036029.1    | pos    | 506443-507711 [26]   |                    | 506855-506888      | 506937-507049 [26] | 507518-507671 [6] | 507691-507700      |
| <i>K. dohrhanskyi</i>      | CCBQ01000012.1 | pos    | 461805-463090 [26]   |                    | 462224-462257      | 462337-462499 [26] | 462905-463051 [6] | 463070-463079      |
| <i>K. lactis</i>           | NC_006038.1    | pos    | 611456 - 612727 [27] | absent[53]         | 611890-611919 [54] | 612006-612090 [26] | 612532-612687 [6] | 612708-612716 [54] |
| <i>E. coralli</i>          | AZAH01000001.1 | neg    | 269038-270368        |                    | 269938-269968      |                    |                   |                    |
| <i>E. cytharariae</i>      | NC_016454.1    | pos    | 54147 - 54960        |                    | 54451-54480        |                    |                   |                    |
| <i>E. gossypii</i>         | NC_005782.2    | neg    | 677871-679048[55]    |                    | 678276-678305 [29] |                    |                   |                    |
| <i>Asfbya aceri</i>        | CP006020.1     | neg    | 693543 - 694708      |                    | 693942-693973      |                    |                   |                    |
| <i>L. kluyveri</i>         | CM000690.1     | pos    | 348600 - 349844      | 348876-348930      | 348957-348982 [56] | 349129-349208      |                   | 349825-349833      |
| <i>L. lanzarotensis</i>    | NW_019212880.1 | pos    | 854162 - 855236      | 854389-854444      |                    | 854754-854820      |                   | 855217-855225      |
| <i>L. vaatii</i>           | AADM01000270.1 | neg    | 134961 - 136000      | 135698-135756 [12] | 135613-135636      | 135409-135470      |                   | 134973-134981      |
| <i>L. thermotolerans</i>   | NC_013079.1    | pos    | 702900 - 703549      | 702730-702791 [12] | 702853-702876      | 703022-703083      |                   | 703530-703538      |
| <i>L. dasiensis</i>        | LT598456.1     | pos    | 682034 - 682916      | 682124-682181      | 682261-682283      |                    |                   | 682900-682905      |
| <i>L. sp. CBS 6924</i>     | LT598470.1     | neg    | 441802 - 442700      | 442582-442638      |                    | 442229-442292      |                   | 441811-441820      |
| <i>L. fermentati</i>       | LT598488.1     | neg    | 306329 - 307150      | 307076-307129      |                    | 306786-306850      |                   | 306339-306348      |
| <i>L. meyersii</i>         | LT598477.1     | pos    | 575851 - 576676      | 575886-575941      |                    | 576233-576294      |                   | 576657-576666      |
| <i>L. mirantina</i>        | LT598468.1     | pos    | 690800 - 691797      |                    |                    | 691218-691282      |                   | 691777-691786      |
| <i>L. nothofagi</i>        | NC_016504.1    | pos    | 388401 - 389382      | 388567-388624      |                    | 388937-389004      |                   | 389362-389371      |
| <i>T. delbrueckii</i>      | NC_016479.1    | pos    | 709007 - 709780      | 709057-709086      |                    | 709267-709336      |                   | 709761-709770      |
| <i>T. microellipsoides</i> | FYBL01000005.1 | neg    | 426211 - 427050      | 427000-427028      |                    | 426726-426817      |                   | 426221-426229      |
| <i>Z. baillii</i>          | HG316456.1     | neg    | 712655 - 713400      |                    |                    | 712902-712974      |                   | 712665-712673      |
| <i>Z. rouxii</i>           | NC_012990.1    | pos    | 297087 - 297883      |                    |                    | 297527-297616      |                   | 297865-297873      |
| <i>Z. parabaatii</i>       | CP019499.1     | pos    | 455564 - 455975[57]  |                    |                    | 455656-455728      |                   | 455957-455965      |
| <i>T. blattae</i>          | NC_020193.1    | neg    | 404150 - 405050      | 405003-405033      |                    | 404650-404733      |                   | 404165-404173      |
| <i>N. castellii</i>        | NC_016499.1    | pos    | 381827 - 383194[54]  | 382404-382432 [12] | 382506-382519 [54] | 382647-382710 [54] | 382994-383155[54] | 383176-383184[54]  |
| <i>N. dairenensis</i>      | NC_016479.1    | neg    | 1519837 - 1521377    | 1520648-1520678    | 1520550-1520562    | 1520303-1520369    | 1519864-1520027   | 1519849-1519857    |
| <i>C. castellii</i>        | CAPW01000002.1 | neg    | 272769 - 274000      |                    | 273158-273179      | 272992-273085      |                   | 272781-272789      |
| <i>N. bacillisporus</i>    | CAPX01000073.1 | pos    | 1230 - 2215          |                    |                    |                    |                   | 2197-2204          |
| <i>C. glabrata</i>         | NC_006032.2    | neg    | 419194 - 421150 [12] | 421007-421081 [12] | 420914-420932 [12] | 420657-420852 [12] |                   | 419206-419214 [12] |
| <i>C. braccarenis</i>      | CAPU01000044.1 | pos    | 2586 - 4361          |                    | 2836-2854          |                    |                   | 4342-4350          |
| <i>N. delphensis</i>       | CAPT01000167.1 | neg    | 254761 - 256469      |                    | 256151-256169      |                    |                   | 254773-254781      |
| <i>C. nicaariensis</i>     | CAPV01000033.1 | pos    | 87530 - 89215        |                    | 87780-87798        |                    |                   | 89196-89204        |
| <i>S. uvarum</i>           | NWY01000011.1  | pos    | 45720 - 46940        | 45996-46050        | 46193-46203        | 46301-46377        | 46703-46848       | 46921-46929        |
| <i>S. eubayanus</i>        | NC_030979.1    | pos    | 476134 - 477336      | 476392-476446      | 476588-476598      | 476694-476770      | 477317-477325     | 477317-477325      |
| <i>S. arboricola</i>       | NC_026172.1    | pos    | 287410 - 288645      | 287705-287739      | 287888-287898      | 288019-288096      | 288417-288558     | 288626-288634      |
| <i>S. kudriavzevii</i>     | AY639012.1     | pos    | 1 - 1215 [25]        | 284-320 [25]       | 424-434            | 585-662            | 981-1128 [6]      | 1201-1209          |
| <i>S. mikatae</i>          | AABZ01000048.1 | neg    | 18591 - 19809[25]    | 19349-19356        | 19349-19356        | 19156-19232        | 18687-18833 [6]   | 18603-18611        |
| <i>S. paradoxus</i>        | CP020294.1     | pos    | 307733 - 308897[25]  | 308010-308045 [25] | 308154-308161      | 308281-308353      | 308660-308803 [6] | 308878-308886      |
| <i>S. cerevisiae</i>       | NC_001134.8    | pos    | 307597 - 308757[11]  | 307880-307914 [58] | 308057-308064 [54] | 308185-308256 [26] | 308563-308682 [6] | 308737-308746[54]  |
| <i>S. pastorianus</i>      | AZCJ01000004.1 | neg    | 478773 - 479970[25]  | 479664-479718 [25] | 479512-479520      | 479340-479417      | 478866-479012 [6] | 478785-478793      |
| <i>S. cere. x S. kud.</i>  | AGVY01000004.1 | pos    | 284183 - 285344      | 284465-284501      | 284645-284655      | 284772-284843      | 285150-285269     | 285325-285333      |
| <i>S. bayanus</i>          | AACG02000058.1 | pos    | 58142 - 59362[25]    | 58418-58472 [25]   | 58613-58620        | 58723-58799        | 59125-59270 [6]   | 59343-59351        |
| <i>S. sp. 'houliardii'</i> | CM003558.1     | pos    | 287536 - 288696      | 287818-287854      | 287998-288008      | 288124-288195      | 288502-288621     | 288677-288685      |
| <i>S. sp. M14</i>          | MVP001000005.1 | neg    | 473800 - 474997      | 474691-474745      | 474537-474547      | 474368-474444      | 473894-474038     | 473812-473820      |
| <i>S. cariocanus</i>       | AY639010.1     | pos    | 1 - 1163[25]         | 278-313 [25]       | 424-434            | 549-621            | 928-1072 [6]      | 1147-1155          |

**Table 1.** Overview of conserved telomere substructures in Saccharomycetacea, as identified by the combined synteny/covariance model pipeline. The 3' end is defined as 10 nt downstream of the SM binding site. The 5' end is approximate. Citations refer to publication in which the sequence and/or the coordinates of respective features are reported explicitly. These annotations form the basis of Figure 2.

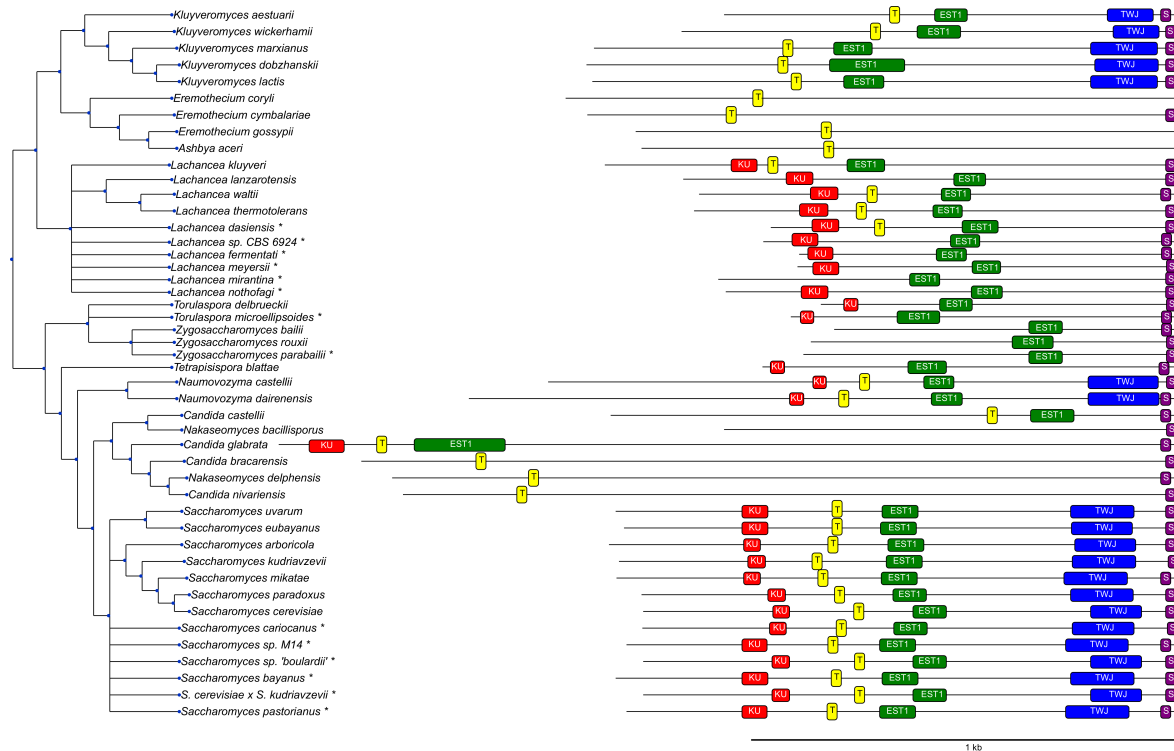

**Figure 2.** Features identified in TER sequences. **KU)** ku binding hairpin, **T)** template region, **EST1)** Est1 binding site, **TWJ)** three-way junction, **SM1)** SM1 binding site. Elements not shown are either not present in the corresponding species (e.g. the TWJ in *C. glabrata*) or could not be located with reasonable certainty. Species marked by \* are not part of the phylogenetic tree and were placed next to their closest related neighbour based on the similarity of their TER sequences.

236 binding site is present even in the more distantly related genus *Candida* [29], this motif is intrinsically  
 237 too variable to be unambiguously recognizable in distant relatives. This pertains to both its sequence  
 238 and the its base-pairing patterns.

239 Consistent with [12], we found no plausible secondary structure for the TWJ in *C. glabrata*,  
 240 although the respective region of the sequence contains the highly conserved sequence AATA. It is  
 241 worth noting in this context that the telomerase of the ciliate *Tetrahymena* has a stem-loop structure  
 242 in place of the threeway junction [61]. TERs of the *C. glabrata* group thus may also have a functional  
 243 trans-activation domain, albeit with an aberrant structure. Our TWJ covariance model, which was  
 244 constructed from *Kluyveromyces* and *Saccharomyces* sequences only, also failed to detect a TWJ in  
 245 *Eremothecium* and *Lachancea*. It remains an open question whether TERs of these species have a TWJ  
 246 with a diverged structure that is just beyond our ability to detect, or whether trans-activation is  
 247 achieved by different means.

248 The sequence of the SM binding motif AATTTTGG is perfectly conserved throughout much of the  
 249 Saccharomycetaceae, with the notable exception of *K.lactis* [54] and additional small variations in other  
 250 *Kluyveromyces* species, see Fig. 3. We could not find this motif in species of the genus *Eremothecium*  
 251 and the highly related species *Ashba acerii*.

#### 252 4. Discussion

253 Although we succeeded in detecting 27 previously unknown TER sequences in  
 254 Saccharomycetaceae, the main take-home message is of this contribution is that homology  
 255 search can be a terribly difficult problem. Although yeast TERs are quite long and fulfil a  
 256 well-conserved function, their sequences are very poorly conserved. In this respect, yeast TER behaves



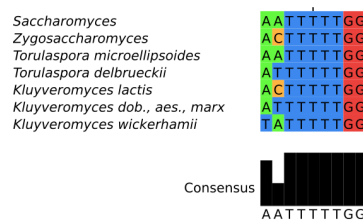

**Figure 3.** Alignment of the core SM-binding site motif. The common pattern of most Saccharomycetaceae is shown on top, species-specific variants are listed below.

257 much like the majority of long non-coding RNAs, which are also poorly conserved in sequence but  
258 often are evolutionary quite well conserved as functional entities, see [62] for a recent review.

259 The “blast graph” in Figure 4 highlights the practical problem. Sequence comparison methods  
260 identify homology only in closely related species. A comparison of Figure 4 and a corresponding  
261 graph based on the previously published TER sequences only (see Online Supplemental Material)  
262 shows that the larger set of queries identifies many additional connections and thus improves the  
263 situation at least within the Saccharomycetaceae. Even within the clade, however, we have been unable  
264 to confirm the candidate hits in *Kasachstania*. The tree in Figure A1 indicates longer branch lengths  
265 leading to *Kasachstania*; it appears that the accelerated evolution of these genomes is already sufficient  
266 to hide the TER genes from our homology search methods.

267 While the direct sequence-based search against complete genomes was not very successful, we  
268 observed that the synteny-based approach worked remarkably well. This is not entirely unexpected,  
269 since the restriction to the interval between a pair of coding genes effectively reduces the size of  
270 the target from several million nucleotides to a few thousand. Unfortunately, the applicability of  
271 synteny-based methods is limited to relatively narrow phylogenetic scales. On longer time-scales,  
272 genome rearrangements are likely to disrupt syntenic conservation. A systematic exploitation of synteny  
273 similar to the work described here for Saccharomycetaceae would most likely be successful in a survey  
274 for TER in the *Candida* group. In fact synteny has been employed to find some of the known TERs in  
275 this clade [29].

276 The study presented here was largely conducted using publicly available tools complemented by  
277 some custom scripting. It also highlights the need for customized tools to conduct difficult homology  
278 searches. In particular, specific alignment tools and viewers to efficiently evaluate the synteny-based  
279 candidates relative to known template sequences and alignments of the better conserved regions  
280 would facilitate the manual curation efforts, which we found to be indispensable.

281 Finally, it remains an open question whether direct machine learning methods can be adapted  
282 as homology search tools, and if so, whether such a strategy can be more effective than sequence  
283 comparison methods. It is likely that such efforts failed so far because of the difficulties inherent  
284 in the construction of a suitable negative training set that is not confounded by frequent genomic  
285 features such as coding sequence. Furthermore, the small number of positive samples was presumably  
286 insufficient to capture the full variability of TER sequences.

287 Complementarily, a phylogenetically dense sample of TERs that are sufficiently similar to support  
288 global sequence alignments might help to better understand the rapid divergence of TER sequences.  
289 This may be helpful not only to identify informative features for machine learning applications, but  
290 may also help to design modified sequence comparison algorithms that better reflect the peculiarities  
291 of rapidly evolving long non-coding RNAs. In this contribution we have provided such a set of TERs  
292 for the Saccharomycetaceae.

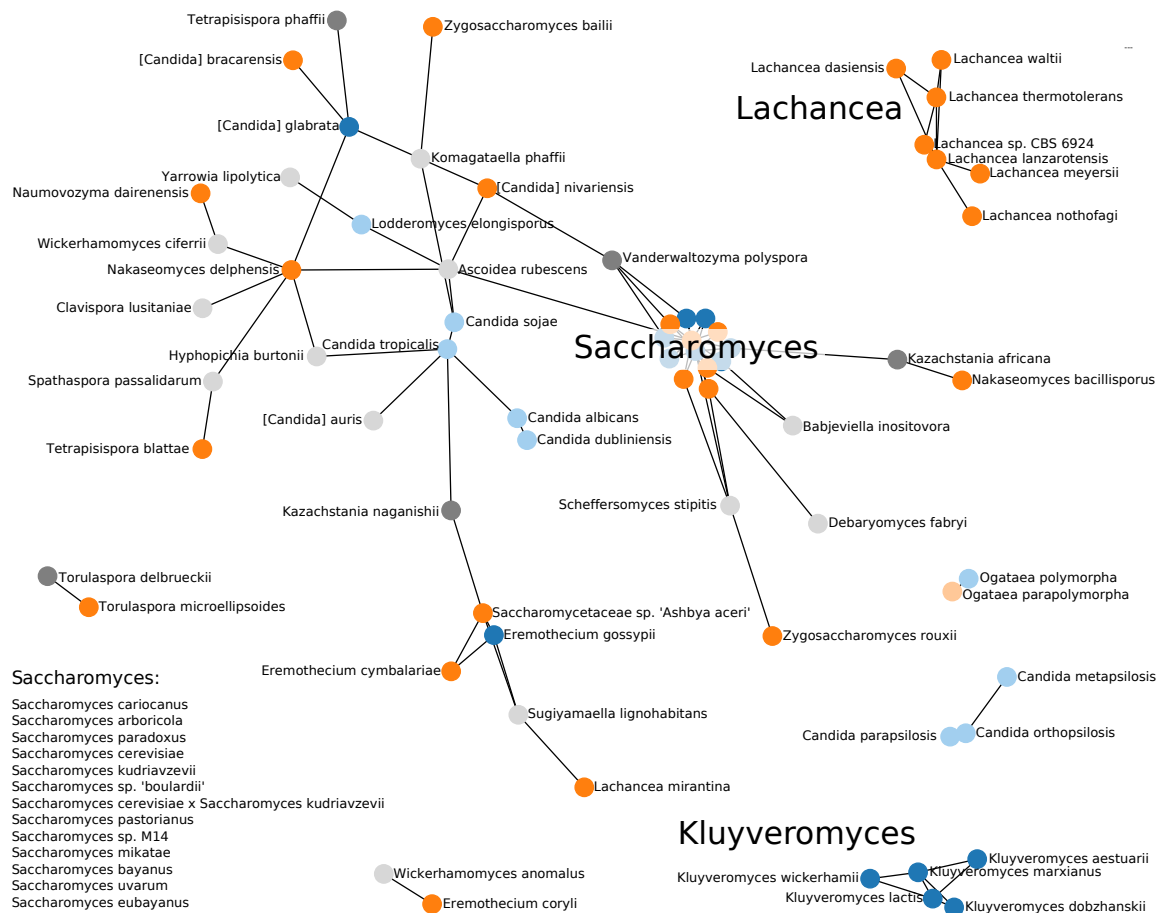

**Figure 4.** Summary of the blast-based survey of TER genes. Blue nodes show TERs described in literature, orange nodes represent TERs that we identified, and grey nodes are additional candidates for which we could not validate characteristic features. TERs outside the Saccharomycetaceae group are presented in light colors. The length of the edges are weighted by the inverse of the length of the blast hit. Note that distances in drawing between nodes not connected by an edge are not indicative of their evolutionary distance.

293 **Supplementary Materials:** Machine readable Supplemental Information, in particular accession numbers, TER  
 294 sequences, alignments of conserved features, and covariance models are available at [http://www.bioinf.uni-](http://www.bioinf.uni-leipzig.de/Publications/SUPPLEMENTS/18-048/)  
 295 [leipzig.de/Publications/SUPPLEMENTS/18-048/](http://www.bioinf.uni-leipzig.de/Publications/SUPPLEMENTS/18-048/).

296 **Acknowledgments:** The research reported here is the outcome of a PhD level seminar taught by PFS at Univ.  
 297 Vienna in the fall term 2017/18. It was funded in part by the Doktoratskolleg RNA Biology at Univ. Vienna,  
 298 the Austrian Science Fund (SFB 4305-B09, I 2874-N28, I-1303 B21), Sinergia (CRSII3\_154471/1), and the German  
 299 Federal Ministry for Education and Research (BMBF 031A538A, de.NBI/RBC).

300 **Author Contributions:** PFS and MTW conceived the study. MW, BT, RO, and MTW analyzed the TER sequences  
 301 and structures, AH conducted the phylogenomic analysis, JvAO and MEMTW contributed machine learning  
 302 approaches. All authors contributed to writing the paper and approved of the submitted version.

303 **Conflicts of Interest:** The authors declare no conflict of interest.

### 304 Appendix A. Phylogenomics of the Saccharomycetales

305 The maximum likelihood tree obtained from 841 orthologous groups of proteins present in at least  
 306 67 of the 72 species is shown in Fig. A1. The phylogeny is nearly identical to the tree reported in [36].  
 307 In particular, it provides strong support for monophyletic Saccharomycetaceae (comprising in particular  
 308 the genera *Saccharomyces* and *Kluyveromyces*), and the *Candida* group. Noteworthy, "*Candida glabrata*"

309 is nested within the Saccharomycetacea as a close relative of *Saccharomyces* rather than appearing as  
310 member of the Candida clade.

311

- 312 1. Greider, C.W.; Blackburn, E.H. Identification of a specific telomere terminal transferase activity in  
313 *Tetrahymena* extracts. *Cell* **1985**, *43*, 405–413.
- 314 2. Mason, J.M.; Reddy, H.M.; Frydrychova, R.C. Telomere Maintenance in Organisms without Telomerase. In  
315 *DNA Replication – Current Advances*; Seligmann, H., Ed.; InTech: Rijeka, HR, 2011; chapter 15.
- 316 3. Pardue, M.; Rashkova, S.; Casacuberta, E.; DeBaryshe, P.G.; George, J.A.; Traverse, K. Two retrotransposons  
317 maintain telomeres in *Drosophila*. *Chromosome Res.* **2005**, *13*, 443–453.
- 318 4. Podlevsky, J.D.; Chen, J. Evolutionary perspectives of telomerase RNA structure and function. *RNA Biol*  
319 **2016**, *13*, 720–732.
- 320 5. Chen, J.; Greider, C.W. An emerging consensus for telomerase RNA structure. *Proc. Natl. Acad. Sci. USA*  
321 **2004**, *101*, 14683–14684.
- 322 6. Brown, Y.; Abraham, M.; Pearl, S.; Kabaha, M.M.; Elboher, E.; Tsfati, Y. A critical three-way junction is  
323 conserved in budding yeast and vertebrate telomerase RNAs. *Nucleic Acids Res.* **2007**, *35*, 6280–6289.
- 324 7. Wu, R.A.; Upton, H.E.; Vogan, J.M.; Collins, K. Telomerase Mechanism of Telomere Synthesis. *Annu Rev*  
325 *Biochem* **2017**, *86*, 439–460.
- 326 8. Webb, C.J.; Zakian, V.A. Telomerase RNA is more than a DNA template. *RNA Biol.* **2016**, *13*, 683–689.
- 327 9. Greider, C.W.; Blackburn, E.H. A telomeric sequence in the RNA of *Tetrahymena* telomerase required for  
328 telomere repeat synthesis. *Nature* **1989**, *337*, 331–337.
- 329 10. Feng, J.; Funk, W.D.; Wang, S.S.; Weinrich, S.L.; Avilion, A.A.; Chiu, C.P.; Adams, R.R.; Chang, E.; Allsopp,  
330 R.C.; Yu, J. The RNA component of human telomerase. *Science* **1995**, *269*, 1236–1241.
- 331 11. Singer, M.S.; Gottschling, D.E. TLC1: template RNA component of *Saccharomyces cerevisiae* telomerase.  
332 *Science* **1994**, *266*, 404–409.
- 333 12. Kachouri-Lafond, R.; Dujon, B.; Gilson, E.; Westhof, E.; Fairhead, C.; Teixeira, M.T. Large telomerase  
334 RNA, telomere length heterogeneity and escape from senescence in *Candida glabrata*. *FEBS Lett.* **2009**,  
335 *583*, 3605–3610.
- 336 13. Cifuentes-Rojas, C.; Kannan, K.; Tseng, L.; Shippen, D.E. Two RNA subunits and POT1a are components  
337 of *Arabidopsis telomerase*. *Proc. Natl. Acad. Sci. USA* **2011**, *108*, 73–78.
- 338 14. Beilstein, M.A.; Brinegar, A.E.; Shippen, D.E. Evolution of the *Arabidopsis* telomerase RNA. *Front Genet.*  
339 **2012**, *3*, 188.
- 340 15. Gupta, S.K.; Kolet, L.; Doniger, T.; Biswas, V.K.; Unger, R.; Tzfati, Y.; Michaeli, S. The *Trypanosoma brucei*  
341 telomerase RNA (TER) homologue binds core proteins of the C/D snoRNA family. *FEBS Lett* **2013**,  
342 *587*, 1399–1404.
- 343 16. Sandhu, R.; Sanford, S.; Basu, S.; Park, M.; Pandya, U.M.; Li, B.; Chakrabarti, K. A trans-spliced telomerase  
344 RNA dictates telomere synthesis in *Trypanosoma brucei*. *Cell Res* **2013**, *23*, 537–551.
- 345 17. Chakrabarti, K.; Pearson, M.; Grate, L.; Sterne-Weiler, T.; Deans, J.; Donohue, J.P.; Ares Jr, M. Structural  
346 RNAs of known and unknown function identified in malaria parasites by comparative genomics and RNA  
347 analysis. *RNA* **2007**, *13*, 1923–1939.
- 348 18. Religa, A.A.; Ramesar, J.; Janse, C.J.; Scherf, A.; Waters, A.P. *P. berghei* Telomerase Subunit TERT is Essential  
349 for Parasite Survival. *PLoS ONE* **2014**, *9*, e108930.
- 350 19. Xie, M.; Mosig, A.; Qi, X.; Li, Y.; Stadler, P.F.; Chen, J.J.L. Size Variation and Structural Conservation of  
351 Vertebrate Telomerase RNA. *J. Biol. Chem.* **2008**, *283*, 2049–2059.
- 352 20. Li, Y.; Marz, M.; Qi, X.; Podlevsky, J.D.; Hoffmann, S.; Stadler, P.F.; Chen, J.J.L. Identification of Purple Sea  
353 Urchin Telomerase RNA using a Next-Generation Sequencing Based Approach. *RNA* **2013**, *19*, 852–860.
- 354 21. Podlevsky, J.D.; Li, Y.; Chen, J.J. Structure and function of echinoderm telomerase RNA. *RNA* **2016**,  
355 *22*, 204–215.
- 356 22. Qi, X.; Li, Y.; Honda, S.; Hoffmann, S.; Marz, M.; Mosig, A.; Podlevskya, J.D.; Stadler, P.F.; Selker, E.U.;  
357 Chen, J.J.L. The common ancestral core of vertebrate and fungal telomerase RNAs. *Nucleic Acids Res.* **2013**,  
358 *41*, 450–462.

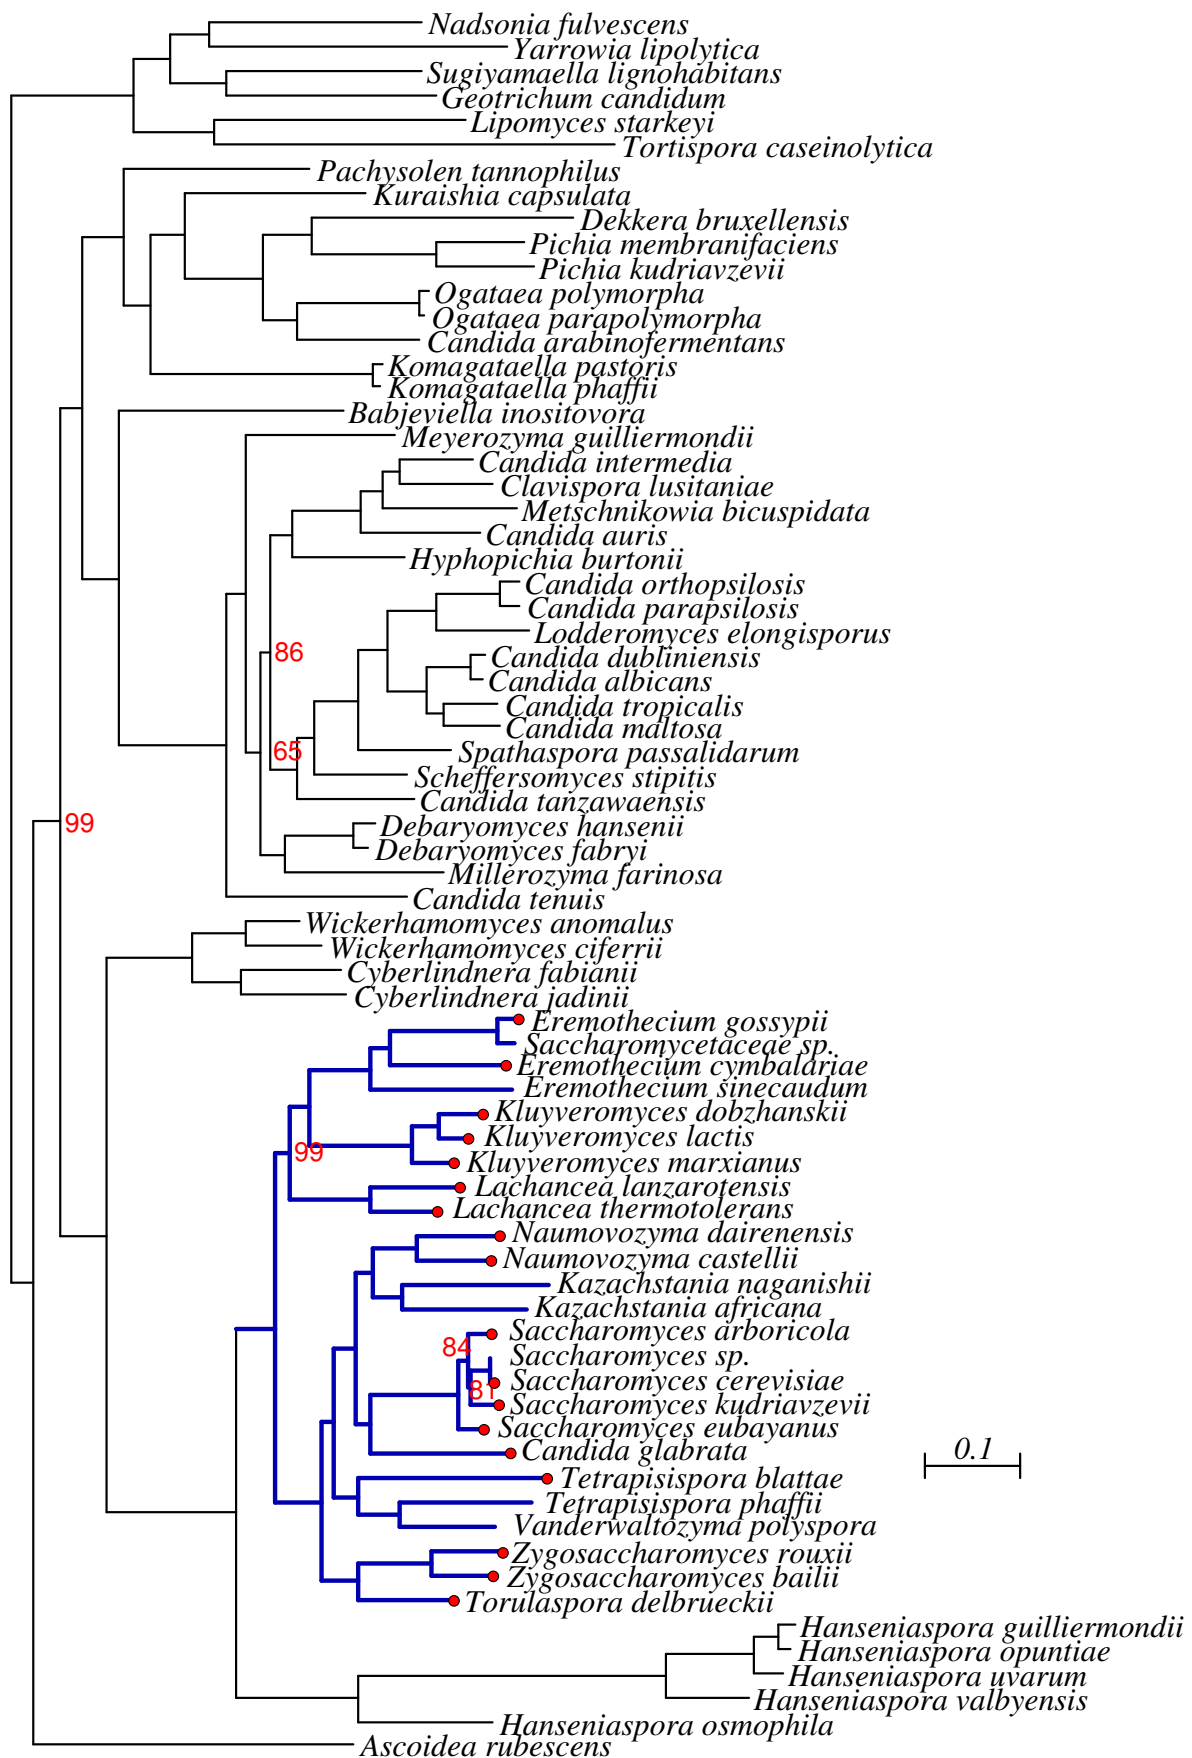

**Figure A1.** Phylogeny of the Saccharomycetales. Bootstrap support is 100% unless otherwise indicated. The Saccharomycetaceae are indicated in dark blue. A red dot at tip of the tree indicates a TER sequences listed in Table 1.

- 359 23. Kuprys, P.V.; Davis, S.M.; Hauer, T.M.; Meltser, M.; Tzfati, Y.; Kirk, K.E. Identification of telomerase RNAs  
360 from filamentous fungi reveals conservation with vertebrates and yeasts. *PLoS One* **2013**, *8*, e58661.
- 361 24. Qi, X.; Rand, D.P.; Podlevsky, J.D.; Li, Y.; Mosig, A.; Stadler, P.F.; Chen, J.J. Prevalent and distinct  
362 spliceosomal 3'-end processing mechanisms for fungal telomerase RNA. *Nat Commun.* **2015**, *6*, 6105.
- 363 25. Dandjinou, A.T.; Lévesque, N.; Larose, S.; Lucier, J.F.; Abou Elela, S.; Wellinger, R.J. A phylogenetically  
364 based secondary structure for the yeast telomerase RNA. *Curr Biol* **2004**, *14*, 1148–1158.
- 365 26. Seto, A.G.; Livengood, A.J.; Tzfati, Y.; Blackburn, E.H.; Cech, T.R. A bulged stem tethers Est1p to telomerase  
366 RNA in budding yeast. *Genes Dev* **2002**, *16*, 2800–2812.
- 367 27. McEachern, M.J.; Blackburn, E.H. Runaway telomere elongation caused by telomerase RNA gene mutations.  
368 *Nature* **1995**, *376*, 403–409.
- 369 28. Hsu, M.; McEachern, M.J.; Dandjinou, A.T.; Tzfati, Y.; Orr, E.; Blackburn, E.H.; Lue, N.F. Telomerase core  
370 components protect *Candida* telomeres from aberrant overhang accumulation. *Proc Natl Acad Sci USA*  
371 **2007**, *104*, 11682–11687.
- 372 29. Gunisova, S.; Elboher, E.; Nosek, J.; Gorkovoy, V.; Brown, Y.; Jean-François, L.; Laterreur, N.; Wellinger, R.J.;  
373 Tzfati, Y.; Tomaska, L. Identification and comparative analysis of telomerase RNAs from *Candida* species  
374 reveal conservation of functional elements. *RNA* **2009**, *15*, 546–559.
- 375 30. Smekalova, E.M.; Malyavko, A.N.; Zvereva, M.I.; Mardanov, A.V.; Ravin, N.V.; Skryabin, K.G.; Westhof, E.;  
376 Dontsova, O.A. Specific features of telomerase RNA from *Hansenula polymorpha*. *RNA* **2013**, *19*, 1563–1574.
- 377 31. Zappulla, D.C.; Goodrich, K.J.; Arthur, J.R.; Gurski, L.A.; Denham, E.M.; Stellwagen, A.E.; Cech, T.R. Ku  
378 can contribute to telomere lengthening in yeast at multiple positions in the telomerase RNP. *RNA* **2011**,  
379 *17*, 298–311.
- 380 32. Mosig, A.; Chen, J.L.; Stadler, P.F. Homology Search with Fragmented Nucleic Acid Sequence Patterns.  
381 Algorithms in Bioinformatics (WABI 2007); Giancarlo, R.; Hannenhalli, S., Eds.; Springer Verlag: Berlin,  
382 Heidelberg, 2007; Vol. 4645, *Lecture Notes in Computer Science*, pp. 335–345.
- 383 33. Nawrocki, E.P.; Eddy, S.R. Infernal 1.1: 100-fold Faster RNA Homology Searches. *Bioinformatics* **2013**,  
384 *29*, 2933–2935.
- 385 34. Hawksworth, D.L. A new dawn for the naming of fungi: impacts of decisions made in Melbourne in July  
386 2011 on the future publication and regulation of fungal names. *IMA Fungus* **2011**, *2*, 155–162.
- 387 35. McNeill, J.; Barrie, F.R.; Buck, W.R.; Demoulin, V.; Greuter, W.; Hawksworth, D.L.; Herendeen, P.S.; Knapp,  
388 S.; Marhold, K.; Prado, J.; Prud'homme van Reine, W.F.; Smith, G.F.; Wiersema, J.H.; Turland, N.J., Eds.  
389 *International Code of Nomenclature for algae, fungi and plants*; Vol. 154, *Regnum Vegetabile*, Koeltz Scientific  
390 Books: Oberreifenberg, D, 2012.
- 391 36. Shen, X.X.; Zhou, X.; Kominek, J.; Kurtzman, C.P.; Hittinger, C.T.; Rokas, A. Reconstructing the Backbone  
392 of the Saccharomycotina Yeast Phylogeny Using Genome-Scale Data. *G3 (Bethesda)* **2016**, *6*, 3927–3939.
- 393 37. Lechner, M.; Findeiß, S.; Steiner, L.; Marz, M.; Stadler, P.F.; Prohaska, S.J. Proteinortho: Detection of  
394 (Co-)Orthologs in Large-Scale Analysis. *BMC Bioinformatics* **2011**, *12*, 124.
- 395 38. Lechner, M.; Hernandez-Rosales, M.; Doerr, D.; Wieseke, N.; Thévenin, A.; Stoye, J.; Hartmann, R.K.;  
396 Prohaska, S.J.; Stadler, P.F. Orthology Detection Combining Clustering and Synteny for Very Large Datasets.  
397 *PLoS ONE* **2014**, *9*, e105015.
- 398 39. Roth, A.C.J.; Gonnet, G.H.; Dessimoz, C. Algorithm of OMA for large-scale orthology inference. *BMC*  
399 *Bioinformatics* **2008**, *9*, 518.
- 400 40. Altenhoff, A.M.; Gil, M.; Gonnet, G.H.; Dessimoz, C. Inferring Hierarchical Orthologous Groups from  
401 Orthologous Gene Pairs. *PLOS One* **2013**, *8*, e53786.
- 402 41. Talavera, G.; Castresana, J. Improvement of phylogenies after removing divergent and ambiguously  
403 aligned blocks from protein sequence alignments. *Syst Biol* **2007**, *56*, 564–577.
- 404 42. Stamatakis, A. RAxML Version 8: A tool for Phylogenetic Analysis and Post-Analysis of Large Phylogenies.  
405 *Bioinformatics* **2014**, *30*, 1312–1313.
- 406 43. Podlevsky, J.D.; Bley, C.J.; Omana, R.V.; Qi, X.; Chen, J.J.L. The Telomerase Database. *Nucleic Acids Res*  
407 **2007**, *36*, D339–D343.
- 408 44. Altschul, S.F.; Gish, W.; Miller, W.; Myers, E.W.; Lipman, D.J. Basic local alignment search tool. *J Mol Biol*  
409 **1990**, *215*, 403–410.
- 410 45. Bailey, T.L.; Boden, M.; Buske, F.A.; Frith, M.; Grant, C.E.; Clementi, L.; Ren, J.; Li, W.W.; Noble, W.S.  
411 MEME SUITE: tools for motif discovery and searching. *Nucleic acids res* **2009**, *37*, W202–W208.

- 412 46. Costa, F.C.; De Grave, K. Fast neighborhood subgraph pairwise distance Kernel. Proceedings of the  
413 27th International Conference on International Conference on Machine Learning (ICML'10); Fürnkranz, J.;  
414 Joachims, T., Eds.; Omnipress: Madison, WI, 2010; pp. 255–262.
- 415 47. Will, S.; Reiche, K.; Hofacker, I.L.; Stadler, P.F.; Backofen, R. Inferring noncoding RNA families and classes  
416 by means of genome-scale structure-based clustering. *PLoS Comp. Biol.* **2007**, *3*, e65.
- 417 48. Katoh, K.; Standley, D.M. MAFFT multiple sequence alignment software version 7: improvements in  
418 performance and usability. *Mol. Biol. Evol.* **2013**, *30*, 772–780.
- 419 49. Darling, A.E.; Mau, B.; Perna, N.T. progressiveMauve: multiple genome alignment with gene gain, loss  
420 and rearrangement. *PloS ONE* **2010**, *5*, e11147.
- 421 50. Wolfinger, M.T.; Fallmann, J.; Eggenhofer, F.; Amman, F. ViennaNGS: A toolbox for building efficient  
422 next-generation sequencing analysis pipelines. *F1000Research* **2015**, *4*.
- 423 51. Teixeira, M.T.; Gilson, E. Telomere maintenance, function and evolution: the yeast paradigm. *Chromosome*  
424 *Research* **2005**, *13*, 535–548.
- 425 52. Wendland, J.; Walther, A. Genome Evolution in the *Eremothecium* Clade of the Saccharomyces Complex  
426 Revealed by Comparative Genomics. *G3: Genes, Genomes, Genetics* **2011**, *1*, 539–548.
- 427 53. Kabaha, M.M.; Zhitomirsky, B.; Schwartz, I.; Tzfati, Y. The 5' Arm of *Kluyveromyces lactis* Telomerase RNA  
428 Is Critical for Telomerase Function. *Mol Cell Biol* **2008**, *28*, 1875–1882.
- 429 54. Telomerase Database - Secondary structures. <http://telomerase.asu.edu/structures.html#secondary>, last  
430 accessed April 30, 2018.
- 431 55. Dietrich, F.S. The *Ashbya gossypii* Genome as a Tool for Mapping the Ancient *Saccharomyces cerevisiae*  
432 Genome. *Science* **2004**, *304*, 304–307.
- 433 56. Genome resources for yeast chromosomes database - TLC1 (Telomerase RNA template). [http://gryc.inra.  
434 fr/index.php?page=locus&seqid=SAKL0D04356r](http://gryc.inra.fr/index.php?page=locus&seqid=SAKL0D04356r), last accessed Apr 30, 2018.
- 435 57. Ortiz-Merino, R.A.; Kuanyshev, N.; Braun-Galleani, S.; Byrne, K.P.; Porro, D.; Branduardi, P.; Wolfe, K.H.  
436 Evolutionary restoration of fertility in an interspecies hybrid yeast, by whole-genome duplication after a  
437 failed mating-type switch. *PLoS Biol* **2017**, *15*, e2002128.
- 438 58. Peterson, S.E.; Stellwagen, A.E.; Diede, S.J.; Singer, M.S.; Haimberger, Z.W.; Johnson, C.O.; Tzoneva, M.;  
439 Gottschling, D.E. The function of a stem-loop in telomerase RNA is linked to the DNA repair protein Ku.  
440 *Nature genetics* **2001**, *27*, 64.
- 441 59. Box, J.A.; Bunch, J.T.; Tang, W.; Baumann, P. Spliceosomal cleavage generates the 3' end of telomerase  
442 RNA. *Nature* **2008**, *456*, 910–914.
- 443 60. Kannan, R.; Helston, R.M.; Dannebaum, R.O.; Baumann, P. Diverse mechanisms for spliceosome-mediated  
444 3' end processing of telomerase RNA. *Nat Commun.* **2015**, *6*, 6104.
- 445 61. Singh, M.; Wang, Z.; Koo, B.K.; Patel, A.; Cascio, D.; Collins, K.; Feigon, J. Structural Basis for Telomerase  
446 RNA Recognition and RNP Assembly by the Holoenzyme La Family Protein p65. *Mol Cell* **2012**, *47*, 16–26.
- 447 62. Nitsche, A.; Stadler, P.F. Evolutionary Clues in lncRNAs. *Wiley Interdiscip Rev RNA* **2017**, *8*, 1.
